# Supplementary material
Source: PubMed Central journal article supplement (PMC3596438)
Supplement: NIHMS441380-supplement-Supp_Material.pdf [file NIHMS441380-supplement-Supp_Material.pdf]

## Supporting Information

Table S1. *Myxococcus xanthus* genes containing the MazF recognition sequence GAGTTGCA within coding sequence. The five candidates analyzed in the main text are shown in red. List was generated using Pattern Locater

| Gene             | Annotation                                                        |
|------------------|-------------------------------------------------------------------|
| MXAN_0052        | hypothetical protein                                              |
| MXAN_0114        | transglycosylase SLT domain-containing protein                    |
| MXAN_0146        | hypothetical protein                                              |
| MXAN_0170        | hypothetical protein                                              |
| MXAN_0180        | sigma-54 dependent transcriptional regulator                      |
| MXAN_0535        | topB,RecQ family DNA topoisomerase III/ATP-dependent DNA helicase |
| MXAN_0730        | O-methyltransferase family protein                                |
| MXAN_0735        | hypothetical protein                                              |
| MXAN_0777        | MerR family transcriptional regulator                             |
| MXAN_0826        | erythromycin esterase family protein                              |
| MXAN_0867        | hypothetical protein                                              |
| MXAN_1043        | glycosyl transferase                                              |
| <b>MXAN_1081</b> | <b>NADH dehydrogenase I subunit M</b>                             |
| MXAN_1145        | DnaJ domain-containing protein                                    |
| MXAN_1200        | phage integrase family site specific recombinase                  |
| MXAN_1238        | hypothetical protein                                              |
| MXAN_1243        | hypothetical protein                                              |
| MXAN_1410        | hypothetical protein                                              |
| MXAN_1683        | LysR family transcriptional regulator                             |
| MXAN_1713        | peptidyl-prolyl cis-trans isomerase domain-containing protein     |
| MXAN_1796        | hypothetical protein                                              |
| MXAN_1817        | hypothetical protein                                              |
| MXAN_1985        | hypothetical protein                                              |
| MXAN_2204        | RNA polymerase sigma-70 factor                                    |
| MXAN_2300        | hypothetical protein                                              |
| MXAN_2317        | sensory box histidine kinase/response regulator                   |
| MXAN_2326        | aldehyde dehydrogenase family protein                             |
| MXAN_2469        | hypothetical protein                                              |
| MXAN_2527        | hypothetical protein                                              |
| MXAN_2561        | fibronectin type III domain-containing protein                    |
| MXAN_2785        | sensory box histidine kinase/response regulator                   |
| MXAN_3095        | sigma-54 dependent transcriptional regulator                      |
| MXAN_3335        | indigoidine synthase A-like protein                               |
| MXAN_3462        | polyketide synthase type I                                        |
| MXAN_3618        | non-ribosomal peptide synthetase                                  |
| MXAN_3634        | non-ribosomal peptide synthase                                    |
| MXAN_3648        | putative permease                                                 |

|           |                                                            |
|-----------|------------------------------------------------------------|
| MXAN_3779 | non-ribosomal peptide synthetase/polyketide synthase       |
| MXAN_3933 | mixed type I polyketide synthase - peptide synthetase      |
| MXAN_3962 | pyridine nucleotide-disulphide oxidoreductase              |
| MXAN_3977 | hypothetical protein                                       |
| MXAN_4001 | non-ribosomal peptide synthase/polyketide synthase         |
| MXAN_4030 | hypothetical protein                                       |
| MXAN_4042 | nla6,sigma-54 dependent DNA-binding reponse regulator Nla6 |
| MXAN_4128 | transposase                                                |
| MXAN_4144 | frzZ,response regulator FrzZ                               |
| MXAN_4189 | TPR repeat-containing protein                              |
| MXAN_4601 | (non-ribosomal peptide synthase                            |
| MXAN_4678 | AAA family ATPase                                          |
| MXAN_5253 | putative acetylpolyamine aminohydrolase                    |
| MXAN_5348 | M23 peptidase domain-containing protein                    |
| MXAN_5410 | ECF subfamily RNA polymerase sigma factor                  |
| MXAN_5427 | hypothetical protein                                       |
| MXAN_5539 | ccoP,cbb3-type cytochrome c oxidase subunit III            |
| MXAN_5815 | putative sporulation initiation inhibitor protein          |
| MXAN_5842 | hypothetical protein                                       |
| MXAN_5852 | sensory box histidine kinase                               |
| MXAN_5894 | LysR family transcriptional regulator                      |
| MXAN_5928 | dapA,dihydrodipicolinate synthase                          |
| MXAN_5960 | fatty acid desaturase family protein                       |
| MXAN_5975 | putative lipoprotein                                       |
| MXAN_6026 | clpA,ATP-dependent Clp protease, ATP-binding subunit ClpA  |
| MXAN_6410 | hypothetical protein                                       |
| MXAN_6656 | 2'-5' RNA ligase                                           |
| MXAN_6679 | hypothetical protein                                       |
| MXAN_6679 | hypothetical protein                                       |
| MXAN_6919 | ferredoxin reductase                                       |
| MXAN_7009 | hypothetical protein                                       |
| MXAN_7151 | orn,oligoribonuclease                                      |
| MXAN_7206 | sensor histidine kinase/response regulator                 |
| MXAN_7321 | AfsR/DnrI/RedD family transcriptional regulator            |
| MXAN_7445 | EpsE, group 1 family glycosyl transferase                  |

Table S2. PCR Primers used in the course of this Study.

| Name               | Sequence                                        |
|--------------------|-------------------------------------------------|
| <b>Cloning</b>     |                                                 |
| <i>mrpC</i> F      | 5'-GTTCTTCATATGCACGGCTTTAACCGCCCG-3'            |
| <i>mrpC</i> R      | 5'-GTTCTTCTCGAGTTTTTCTTTACCCGCGATTTTACGCAGTG-3' |
| <i>mrpC2</i> F     | 5'-GTTCTTCATATGGTCACCGCTACCGCTAAC-3'            |
| <i>mrpC2</i> R     | 5'-GTTCTTCTCGAGTTTTTCTTTACCCGCGATTTTACGCAGTG-3' |
| <i>nla6</i> up F   | 5'-GTTCTTGGTACCTTGGGCAGCGCACGAATC-3'            |
| <i>nla6</i> up R   | 5'-GTTCTTGAGCTCGATGGGGATCTCACCCAATTC-3'         |
| <i>nla6</i> down F | 5'-GTTCTTGAGCTCCAGGCCAAGCTCCTGCG-3'             |
| <i>nla6</i> down R | 5'-GTTCTTAAGCTTTCAGCGGATGACGAACGAGTTG-3'        |
| <b>qRT-PCR</b>     |                                                 |
| <i>mazF</i> F      | 5'-ACGACGTCTTCAATCACTCACGCA-3'                  |
| <i>mazF</i> R      | 5'-TTTCCCTCTCCCACTTCGAGCA-3'                    |
| <i>mrpC</i> F      | 5'-TCCTTCGTGTCCACGCTCATCAA-3'                   |
| <i>mrpC</i> R      | 5'-TACTTCTCCTTGCCGGCGATCTT-3'                   |
| <i>rpoC</i> F      | 5'-ATGCTGGACGTGATTCCGGTGATT-3'                  |
| <i>rpoC</i> R      | 5'-TTCAGACGGTTGTTGCGGTTGATG-3'                  |
| <i>nuoM</i> F      | 5'-TTCATCGTCCTGGTCGCTGTGAT-3'                   |
| <i>nuoM</i> R      | 5'-ATCACCTCTACCCGAAGTCGGTC-3'                   |
| <i>clpA</i> F      | 5'-GCTTGTTTCATCTACGGCGCGTT-3'                   |
| <i>clpA</i> R      | 5'-ATGGTGAGCACCGTCTCGGA-3'                      |
| <i>nla6</i> F      | 5'-TCTTTCCTGGACGAATTGGGTGAGA-3'                 |
| <i>nla6</i> R      | 5'-ATCTCCTGCTTGAGGTCACGGTT-3'                   |
| <i>frzZ</i> F      | 5'-TTCTGCCGCTTCATCAAGAGCAAC-3'                  |
| <i>frzZ</i> R      | 5'-TACTCGTTACCGGTGGGCATCA-3'                    |
| <i>epsE</i> F      | 5'-TGCCATCCAGTGTGCAGAAGATTG-3'                  |
| <i>epsE</i> R      | 5'-GCCAGCTGTGCGAGATGAT-3'                       |
| MXAN1501F          | 5'-ATGAGAATGCGTTGCGTGGTTTCG-3'                  |
| MXAN1501R          | 5'-TTTGACCACGCCATTCTCTTGCAC-3'                  |

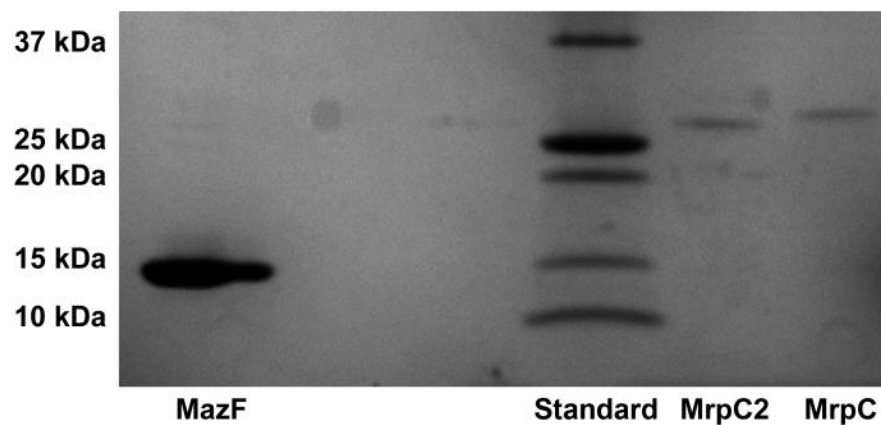

**Figure S1.** SDS-PAGE of purified, recombinant MazF, MrpC, and MrpC2 proteins. MazF possesses a band of approximately 15 kDa. MrpC and MrpC2 appear as single bands of approximately 27 and 25 kDa, respectively. Precision Plus Protein standard (Bio-Rad, Hercules, CA) is shown for size comparison.

|           |     |                                                                |
|-----------|-----|----------------------------------------------------------------|
| Optimized | 1   | CCGCCGGAACGCATCAATCGTGGTGACGTGTTTTGGGTGGAACCGACGACAGCCGTGGC    |
| Original  | 1   | CCGCCGGAACGCATTAACCGCGCGATGTGTTTTGGGTGGAACCGGATGATAGCCGCGGC    |
| Optimized | 60  | CCGGTGCCGAGCTACTCTCATCCGCATGTGGTTGTCCAGGATGACGTGTTTAATCATAGC   |
| Original  | 60  | CCGGTGCCGAGCTATAGCCATCCGCATGTGGTGGTGCAGGATGATGTGTTTAACCATAGC   |
| Optimized | 120 | CGTATTACCACGGTGGTTGTCTGCGCACTGACCTCAAACCTGCACCGCGTTCCGGAACCG   |
| Original  | 120 | CGCATTACCACCGTGGTGGTGTGCGCGCTGACCAGCAACCTGCATCGCGCGAGCGAACCG   |
| Optimized | 180 | GGCAATGTGCTGCTGGAA GTTGGCGAAGGTAACCTGCCGAAACAGAGTGTGGTTGTCTGTG |
| Original  | 180 | GGCAACGTGCTGCTGGAAGTGGGCGAAGGCAACCTGCCGAAACAGAGCGTGGTGGTGGTG   |
| Optimized | 240 | TCCCAAGTTAGCTCTGTGCGATAAAGCACGTCTGGGTGAACGTATCGGTGCACTGAGTGAC  |
| Original  | 240 | AGCCAGGTGAGCAGCGTGGATAAAGCGCGCCTGGGCGAACGCATTGGCGCGCTGAGCGAT   |
| Optimized | 300 | GCCCGTGTGGAA CAAATCCTGGCTGGTCTGCGTTTTCAACAAGTCTCCTTCTTCGCTCGT  |
| Original  | 300 | GCGCGCGTGGAAACAGATTCTGGCGGGCCTGCGCTTTCAGCAGGTGAGCTTTTTTTCGCGC  |
| Optimized | 360 | CCGTAA                                                         |
| Original  | 360 | CCGTGA                                                         |

**Figure S2.** Codon optimized sequence of *mazF* (MXAN\_1659) used to create the MazF expression vector pTOB2 . Changed codons are shown in red. Sequence was optimized for expression and secondary structure in *E. coli* by Genscript (Piscataway, NJ, USA).

Figure S3

|           |     |                                                               |
|-----------|-----|---------------------------------------------------------------|
| Optimized | 0   | CACGGCTTTAACCGCCCGCTGGGTCGGATTGGCTCAAATGTTGTGGCACCGCTGCAAACG  |
| Original  | 0   | CATGGCTTTAACCGCCCGCTGGGCCGATTGGCAGCAACGTGGTGGCGCCGCTGCAGACC   |
| Optimized | 60  | ACGTCCTCAGGCATGATGGTACCCTAACAACTGGTCCCGGTCAGGAAGCCATCGAT      |
| Original  | 60  | ACCAGCAGCGGCATGATGGTGACCGCAACAACTGGTGCCGGCCAGGAAGCGATTGAT     |
| Optimized | 120 | TTCAAAGGCTACTTCAAAGTTGAATCGTTCCGCATAACAGCACCATCTATCGTCCGGGT   |
| Original  | 120 | TTTAAAGGCTATTTTAAAGTGAATCGTTCCGCATAACAGCACCATTTATCGCCCGGGC    |
| Optimized | 180 | GATAATACGGACCGCTTACCTGCTGAAATCTGGTCGTGTCGCGCTGATGCGTATTGGC    |
| Original  | 180 | GATAACACCGATCGCGTGTATCTGCTGAAAAGCGGCCGCTGCGCTGATGCGCATTGGC    |
| Optimized | 240 | AAA AATAGTACCCGCTCCGCTGGTTTCAATCTGCGTCCGGGTGACCTGTTTGGTGAAGT  |
| Original  | 240 | AAAAACAGCACCCGCGAGCGTGGTGAGCATTCTGCGCCCGGGCGATCTGTTTGGCGAACTG |
| Optimized | 300 | TTCCGTCCGGAGGGTACGCCGATTGAAGAAATGGCGATCGCGGCCGGTGAAGCCGAAGT   |
| Original  | 300 | TTTCGCCCGGAAGGCACCCCGATTGAAGAAATGGCGATTGCGCGGGCGAAGCGGAAGT    |
| Optimized | 360 | TGGTCCATTGAAGGCCGTGATTTTCTGTCACAACTGGAAGCACGTCCGGCACTGGCTGTT  |
| Original  | 360 | TGGAGCATTGAAGGCCGCGATTTTCGCGCGCAGCTGGAAGCGCGCCCGCGCTGGCGGTG   |
| Optimized | 420 | GACGTCGTGCGTGCATACGCAGAACGTGTGCGTGCACTGCGTAAACGCGTTCTGGGTCTG  |
| Original  | 420 | GATGTGGTGCAGCGTATGCGGAACCGTGCAGCGCTGCGCAAACGCGTGTGGCCCTG      |
| Optimized | 480 | ACCTTCAAAGAAGTGCCGCGCACGTCTGGCTGATACCCTGCTGACGCTGTTGAAGCGCAT  |
| Original  | 480 | ACCTTTAAAGAAGTGCCGGCGCGCTGGCGGATACCCTGCTGACCCTGGTGAAGCGCAT    |
| Optimized | 540 | GGCGAA CGTTGCCCGCACGGCGGTGAAACCGACCTGCGTGGTATTACGCAGCAAGATCTG |
| Original  | 540 | GGCGAACGCTGCCCGCATGGCGGCGAAACCGATCTGCGGGCATTACCCAGCAGGATCTG   |
| Optimized | 600 | GCAGACCTGGTCGGTGCGAGCCGCTCTTTCTGTGAGCACCTGATCAACGAAATGAAACGT  |
| Original  | 600 | GCGGATCTGGTGGGCGGAGCCGCGAGCTTTGTGAGCACCTGATTAACGAAATGAAACGC   |
| Optimized | 660 | GAAGGCGTTCTGGTAATGTCCGGCTATCCTGTGTGTCCGTGACCAGAAAGCACTGCGT    |
| Original  | 660 | GAAGGCGTGTGGCAACGTGGGCCGATTCTGTGCGTGCAGATCAGAAAGCGTGCAGC      |
| Optimized | 720 | AAAATCGCGGTAAGAAAAATAA                                        |
| Original  | 720 | AAAATTGCGGGCAAAGAAAAATGA                                      |

**Figure S3.** Codon optimized sequence of *mrpC* (MXAN\_5125) used to create the MrpC and MrpC2 expression vectors pTOB14 and pTOB15. Changed codons are shown in red. Sequence was optimized for expression in *E. coli* by Genscript (Piscataway, NJ, USA).
